# Supplementary material
Source: PubMed Central journal article supplement (PMC9585472)
Supplement: jamaophthalmol-e224146-s001.pdf [file jamaophthalmol-e224146-s001.pdf]

## Supplemental Online Content

Smirnov VM, Robert MP, Condroyer C, et al. Association of missense variants in *VSX2* with a peculiar form of congenital stationary night blindness affecting all bipolar cells. *JAMA Ophthalmol*. Published online October 20, 2022. doi:10.1001/jamaophthalmol.2022.4146

**eFigure 1.** Multimodal retinal imaging in patients 1 and 2 from the same family

**eFigure 2.** Ultrasound biomicroscopy in patient 3

**eTable 1.** The molecular diagnosis NGS panel including 164 genes associated with pediatric inherited retinal diseases

**eTable 2.** Homozygous variants found in ES for autosomal recessive model

**eAppendix.** Discussion of *VSX2* variants identified herein in respect to the literature

**eReferences**

This supplemental material has been provided by the authors to give readers additional information about their work.

## Patient 1

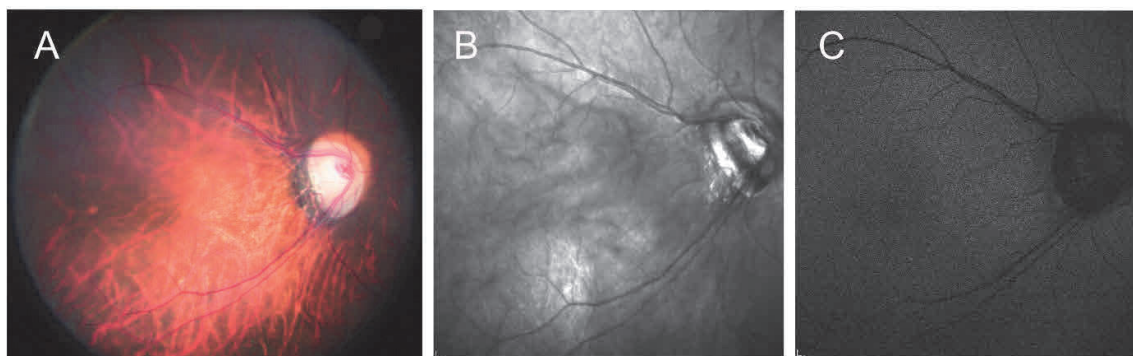

## Patient 2

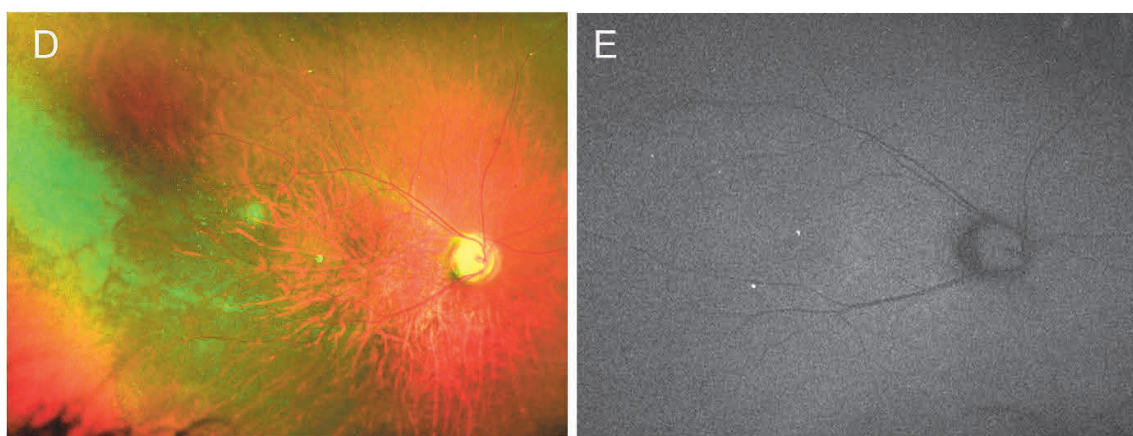

**eFigure 1. Multimodal retinal imaging in patients 1 and 2 from the same family.** *Top, patient 1. A, fundus photo. Myopic fundus abnormalities with oval tilted optic discs, temporal pallor and peripapillary chorio-retinal atrophy, narrowed retinal vessels and thinned retina with increased choroidal visibility. B, Infrared reflectance. No obvious changes in retinal reflectance besides increased choroidal visibility. C, Short-wavelength fundus autofluorescence. No obvious changes. Bottom, patient 2. D, wide-field fundus photo. Myopic fundus abnormalities with oval tilted optic disc, temporal pallor, narrowed retinal vessels, retinal thinning. White-without-pressure in temporal periphery. E, wide-field short-wavelength fundus autofluorescence. No obvious changes.*

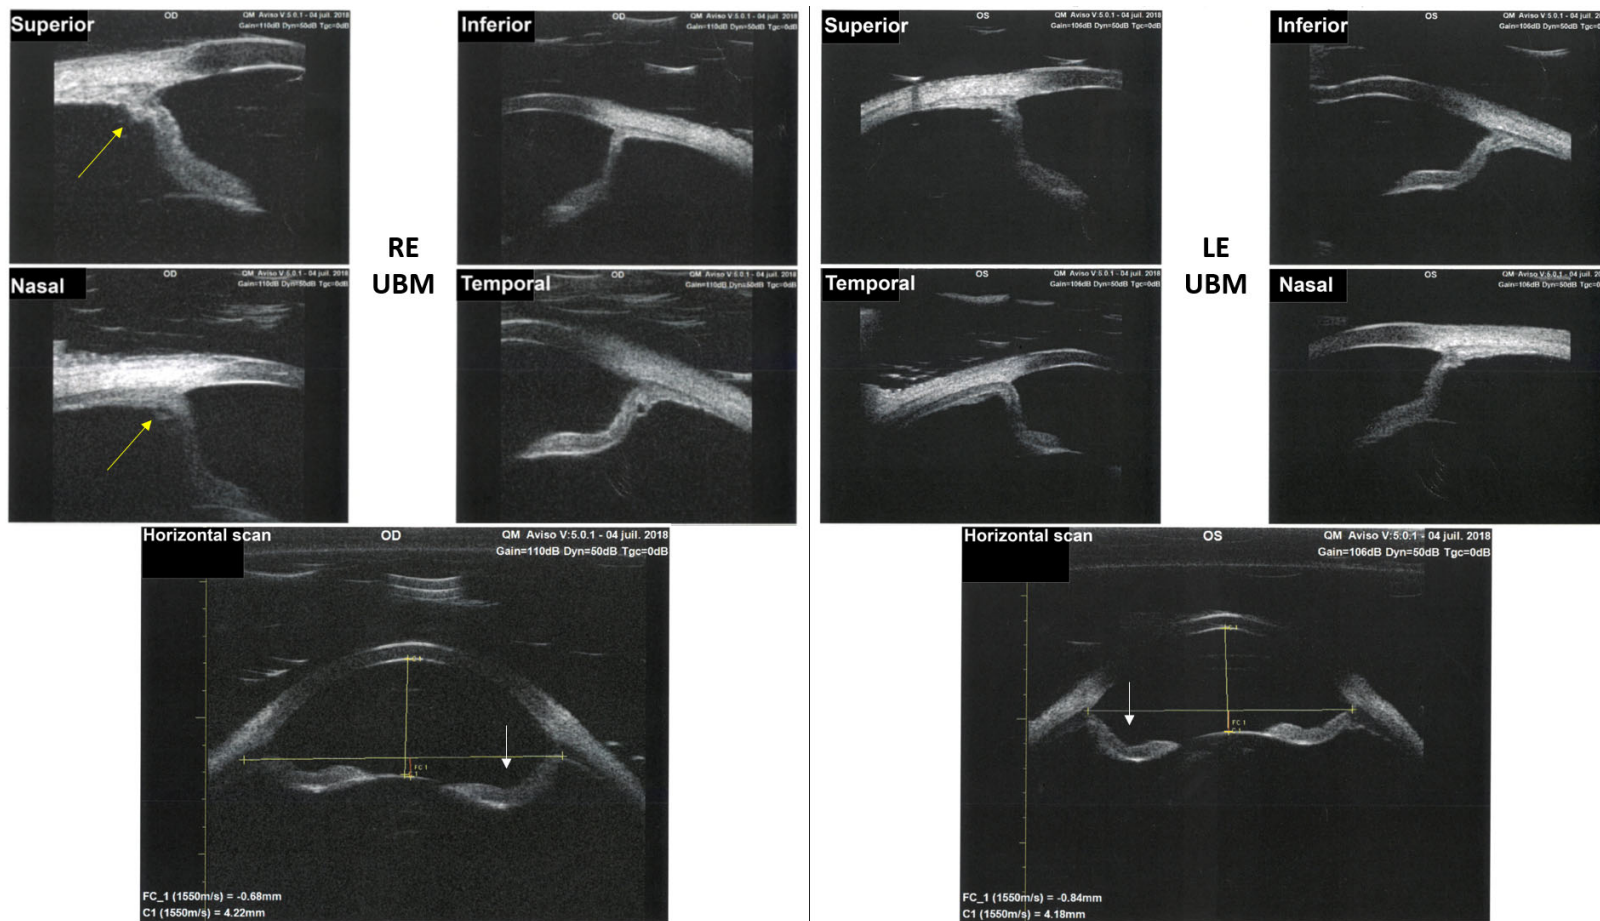

*eFigure 2. Ultrasound biomicroscopy in patient 3. Hypoplastic ciliary body (yellow arrows). Posterior iris bowing (white arrows).*

*eTable 1. The molecular diagnosis NGS panel including 164 genes associated with pediatric inherited retinal diseases.*

| <b>Name</b>     | <b>Transcript</b>  | <b>Chr</b> | <b>Start(hg19)</b> | <b>End(hg19)</b> | <b>Refseq</b> | <b>Description</b>                                           |
|-----------------|--------------------|------------|--------------------|------------------|---------------|--------------------------------------------------------------|
| <i>ABCA4</i>    | ENST00000370225 1  | 1          | 94458393           | 94586688         | NM_000350     | ATP-binding cassette, sub-family A (ABC1), member 4          |
| <i>ACBD5</i>    | ENST00000396271 10 | 10         | 27484146           | 27529744         | NM_145698     | acyl-CoA binding domain containing 5                         |
| <i>ADAM9</i>    | ENST00000487273 8  | 8          | 38854505           | 38962520         | NM_003816     | ADAM metalloproteinase domain 9                              |
| <i>AHI1</i>     | ENST00000327035 6  | 6          | 135708922          | 135818883        | NM_001134832  | Abelson helper integration site 1                            |
|                 | ENST00000457866 6  | 6          | 135605124          | 135818903        | NM_017651     | Abelson helper integration site 1                            |
| <i>AIPL1</i>    | ENST00000381129 17 | 17         | 6327057            | 6338505          | NM_014336     | aryl hydrocarbon receptor interacting protein-like 1         |
| <i>ALMS1</i>    | ENST00000264448 2  | 2          | 73612886           | 73837046         | XM_005264552  | Alstrom syndrome 1                                           |
| <i>ARL13B</i>   | ENST00000471138 3  | 3          | 93698999           | 93772913         | NM_182896     | ADP-ribosylation factor-like 13B                             |
| <i>ARL2BP</i>   | ENST00000219204 16 | 16         | 57279010           | 57287516         | NM_012106     | ADP-ribosylation factor-like 2 binding protein               |
| <i>ARL6</i>     | ENST00000493990 3  | 3          | 97483365           | 97519953         |               | ADP-ribosylation factor-like 6                               |
| <i>ATF6</i>     | ENST00000367942 1  | 1          | 161736084          | 161933860        | NM_007348     | activating transcription factor 6                            |
| <i>ATXN7</i>    | ENST00000484332 3  | 3          | 63953420           | 63985472         | NM_001128149  | ataxin 7                                                     |
|                 | ENST00000538065 3  | 3          | 63898275           | 63989129         |               | ataxin 7                                                     |
| <i>CIQTNF5</i>  | ENST00000528368 11 | 11         | 119209652          | 119211593        | NM_001278431  | CIq and tumor necrosis factor related protein 5              |
| <i>C21orf2</i>  | ENST00000397956 21 | 21         | 45749774           | 45759276         | NM_001271441  | chromosome 21 open reading frame 2                           |
| <i>C2orf71</i>  | ENST00000331664 2  | 2          | 29284558           | 29297127         | NM_001029883  | chromosome 2 open reading frame 71                           |
| <i>C5orf42</i>  | ENST00000425232 5  | 5          | 37106330           | 37249530         | XM_005248352  | chromosome 5 open reading frame 42                           |
| <i>C8orf37</i>  | ENST00000286688 8  | 8          | 96257147           | 96281429         | NM_177965     | chromosome 8 open reading frame 37                           |
| <i>CA4</i>      | ENST00000300900 17 | 17         | 58227297           | 58236901         | NM_000717     | carbonic anhydrase IV                                        |
| <i>CABP4</i>    | ENST00000438189 11 | 11         | 67219886           | 67226699         | XM_005274116  | calcium binding protein 4                                    |
|                 | ENST00000325656 11 | 11         | 67222818           | 67226524         | XM_005274114  | calcium binding protein 4                                    |
| <i>CACNA1F</i>  | ENST00000376265 X  | X          | 49061523           | 49089833         | NM_005183     | calcium channel, voltage-dependent, L type, alpha 1F subunit |
|                 | ENST00000376251 X  | X          | 49061523           | 49089771         | NM_001256790  | calcium channel, voltage-dependent, L type, alpha 1F subunit |
| <i>CACNA2D4</i> | ENST00000382722 12 | 12         | 1901123            | 2028002          | NM_172364     | calcium channel, voltage-dependent, alpha 2/delta subunit 4  |
| <i>CC2D2A</i>   | ENST00000503658 4  | 4          | 15471637           | 15483000         |               | coiled-coil and C2 domain containing 2A                      |
|                 | ENST00000515124 4  | 4          | 15471536           | 15483883         | NM_001164720  | coiled-coil and C2 domain containing 2A                      |
|                 | ENST00000413206 4  | 4          | 15471489           | 15603180         | XM_005248179  | coiled-coil and C2 domain containing 2A                      |
| <i>CCT2</i>     | ENST00000299300 12 | 12         | 69979114           | 69995350         | XM_005268574  | chaperonin containing TCP1, subunit 2 (beta)                 |

|                |                 |    |           |           |              |                                                            |
|----------------|-----------------|----|-----------|-----------|--------------|------------------------------------------------------------|
| <i>CDH3</i>    | ENST00000264012 | 16 | 68678739  | 68732971  | NM 001793    | cadherin 3, type 1, P-cadherin (placental)                 |
| <i>CDHR1</i>   | ENST00000332904 | 10 | 85954410  | 85979377  | NM 001171971 | cadherin-related family member 1                           |
|                | ENST00000372117 | 10 | 85954414  | 85977122  | NM 033100    | cadherin-related family member 1                           |
| <i>CEP104</i>  | ENST00000378230 | 1  | 3728645   | 3773763   | XM 005244815 | centrosomal protein 104kDa                                 |
| <i>CEP164</i>  | ENST00000278935 | 11 | 117198571 | 117283984 | XM 005271460 | centrosomal protein 164kDa                                 |
| <i>CEP290</i>  | ENST00000552810 | 12 | 88442797  | 88535993  | XM 005269161 | centrosomal protein 290kDa                                 |
| <i>CEP41</i>   | ENST00000489512 | 7  | 130058875 | 130080897 | NM 001257160 | centrosomal protein 41kDa                                  |
|                | ENST00000223208 | 7  | 130033612 | 130081078 | XM 005277633 | centrosomal protein 41kDa                                  |
| <i>CERKL</i>   | ENST00000339098 | 2  | 182402911 | 182521733 |              | ceramide kinase-like                                       |
| <i>CLN3</i>    | ENST00000359984 | 16 | 28488600  | 28503403  | NM 000086    | ceroid-lipofuscinosis, neuronal 3                          |
| <i>CLRN1</i>   | ENST00000328863 | 3  | 150645723 | 150690495 | NM 001195794 | clarin 1                                                   |
|                | ENST00000295911 | 3  | 150643950 | 150662023 | NM 052995    | clarin 1                                                   |
| <i>CLUAP1</i>  | ENST00000576634 | 16 | 3550924   | 3589048   | NM 015041    | clusterin associated protein 1                             |
| <i>CNGA1</i>   | ENST00000402813 | 4  | 47937994  | 47983552  | XM 005248050 | cyclic nucleotide gated channel alpha 1                    |
| <i>CNGA3</i>   | ENST00000393504 | 2  | 98962618  | 99015057  | NM 001298    | cyclic nucleotide gated channel alpha 3                    |
| <i>CNGB1</i>   | ENST00000311183 | 16 | 57988579  | 58005020  | NM 001135639 | cyclic nucleotide gated channel beta 1                     |
|                | ENST00000251102 | 16 | 57917706  | 58005016  | NM 001297    | cyclic nucleotide gated channel beta 1                     |
| <i>CNGB3</i>   | ENST00000320005 | 8  | 87586163  | 87755903  | NM 019098    | cyclic nucleotide gated channel beta 3                     |
| <i>CNNM4</i>   | ENST00000377075 | 2  | 97426639  | 97477628  | NM 020184    | cyclin M4                                                  |
| <i>COL18A1</i> | ENST00000400337 | 21 | 46825052  | 46933634  | XM 005261181 | collagen, type XVIII, alpha 1                              |
|                | ENST00000355480 | 21 | 46875403  | 46933634  | XM 005261178 | collagen, type XVIII, alpha 1                              |
|                | ENST00000359759 | 21 | 46875424  | 46933633  | XM 005261182 | collagen, type XVIII, alpha 1                              |
| <i>CRB1</i>    | ENST00000535699 | 1  | 197170592 | 197447212 | NM 001257965 | crumbs homolog 1 (Drosophila)                              |
|                | ENST00000367400 | 1  | 197237408 | 197447585 | NM 201253    | crumbs homolog 1 (Drosophila)                              |
| <i>CRX</i>     | ENST00000221996 | 19 | 48325097  | 48346587  | NM 000554    | cone-rod homeobox                                          |
| <i>CSPP1</i>   | ENST00000262210 | 8  | 67976603  | 68108498  | XM 005251311 | centrosome and spindle pole associated protein 1           |
| <i>CYP4V2</i>  | ENST00000378802 | 4  | 187112674 | 187131955 | XM 005262935 | cytochrome P450, family 4, subfamily V, polypeptide 2      |
| <i>DHDDS</i>   | ENST00000360009 | 1  | 26758846  | 26797785  | NM 024887    | dehydrodolichyl diphosphate synthase                       |
| <i>DHX38</i>   | ENST00000268482 | 16 | 72127461  | 72146811  | XM 005256268 | DEAH (Asp-Glu-Ala-His) box polypeptide 38                  |
| <i>DRAM2</i>   | ENST00000539140 | 1  | 111659957 | 111682838 | NM 178454    | DNA-damage regulated autophagy modulator 2                 |
| <i>EFEMP1</i>  | ENST00000394555 | 2  | 56093102  | 56151274  | NM 001039348 | EGF containing fibulin-like extracellular matrix protein 1 |
| <i>ELOVL4</i>  | ENST00000369816 | 6  | 80624529  | 80657297  | NM 022726    | ELOVL fatty acid elongase 4                                |
| <i>EYS</i>     | ENST00000370621 | 6  | 64430032  | 66417107  |              | eyes shut homolog (Drosophila)                             |

|                |                 |    |           |           |              |                                                                                   |
|----------------|-----------------|----|-----------|-----------|--------------|-----------------------------------------------------------------------------------|
|                | ENST00000393380 | 6  | 66039165  | 66417118  | NM_001142801 | eyes shut homolog (Drosophila)                                                    |
| <i>FAM161A</i> | ENST00000404929 | 2  | 62051991  | 62081188  | NM_001201543 | family with sequence similarity 161, member A                                     |
| <i>FLVCRI</i>  | ENST00000366971 | 1  | 213031597 | 213072705 | NM_014053    | feline leukemia virus subgroup C cellular receptor 1                              |
| <i>FSCN2</i>   | ENST00000334850 | 17 | 79495558  | 79504106  | XM_005257195 | fascin homolog 2, actin-bundling protein, retinal (Strongylocentrotus purpuratus) |
| <i>GNAT1</i>   | ENST00000232461 | 3  | 50229045  | 50233949  | NM_144499    | guanine nucleotide binding protein, alpha transducing activity polypeptide 1      |
| <i>GNAT2</i>   | ENST00000351050 | 1  | 110145889 | 110155679 | NM_005272    | guanine nucleotide binding protein, alpha transducing activity polypeptide 2      |
| <i>GNPTG</i>   | ENST00000204679 | 16 | 1401924   | 1413352   | NM_032520    | N-acetylglucosamine-1-phosphate transferase, gamma subunit                        |
| <i>GPR125</i>  | ENST00000334304 | 4  | 22389007  | 22517677  | XM_005248137 | G protein-coupled receptor 125                                                    |
| <i>GPR179</i>  | ENST00000342292 | 17 | 36481493  | 36499693  | NM_001004334 | G protein-coupled receptor 179                                                    |
| <i>GRM6</i>    | ENST00000231188 | 5  | 178405328 | 178422124 | NM_000843    | glutamate receptor, metabotropic 6                                                |
| <i>GUCA1A</i>  | ENST00000053469 | 6  | 42123174  | 42147794  | XM_005249037 | guanylate cyclase activator 1A (retina)                                           |
| <i>GUCA1B</i>  | ENST00000230361 | 6  | 42152139  | 42162654  | NM_002098    | guanylate cyclase activator 1B (retina)                                           |
| <i>GUCY2D</i>  | ENST00000254854 | 17 | 7905912   | 7923657   | NM_000180    | guanylate cyclase 2D, membrane (retina-specific)                                  |
| <i>HGSNAT</i>  | ENST00000379644 | 8  | 42995598  | 43057998  | XM_005273692 | heparan-alpha-glucosaminide N-acetyltransferase                                   |
| <i>HK1</i>     | ENST00000404387 | 10 | 71048500  | 71160891  | XM_005269736 | hexokinase 1                                                                      |
|                | ENST00000359426 | 10 | 71078600  | 71161638  | XM_005269737 | hexokinase 1                                                                      |
|                | ENST00000360289 | 10 | 71029756  | 71161635  | NM_033498    | hexokinase 1                                                                      |
|                | ENST00000298649 | 10 | 71075610  | 71161635  | NM_033496    | hexokinase 1                                                                      |
| <i>IDH3B</i>   | ENST00000380851 | 20 | 2639041   | 2644865   | NM_001258384 | isocitrate dehydrogenase 3 (NAD+) beta                                            |
|                | ENST00000380843 | 20 | 2639041   | 2644865   | XM_005260716 | isocitrate dehydrogenase 3 (NAD+) beta                                            |
| <i>IFT140</i>  | ENST00000426508 | 16 | 1560428   | 1662111   | XM_005255724 | intraflagellar transport 140 homolog (Chlamydomonas)                              |
| <i>IFT172</i>  | ENST00000260570 | 2  | 27667238  | 27712624  | NM_015662    | intraflagellar transport 172 homolog (Chlamydomonas)                              |
| <i>IMPDH1</i>  | ENST00000338791 | 7  | 128032331 | 128050306 | XM_005250315 | IMP (inosine 5'-monophosphate) dehydrogenase 1                                    |
|                | ENST00000354269 | 7  | 128032332 | 128050036 | XM_005250315 | IMP (inosine 5'-monophosphate) dehydrogenase 1                                    |
| <i>IMPG1</i>   | ENST00000369950 | 6  | 76630832  | 76782395  | NM_001563    | interphotoreceptor matrix proteoglycan 1                                          |
| <i>IMPG2</i>   | ENST00000193391 | 3  | 100941390 | 101039404 | NM_016247    | interphotoreceptor matrix proteoglycan 2                                          |
| <i>INPP5E</i>  | ENST00000371712 | 9  | 139323071 | 139334274 | XM_005266094 | inositol polyphosphate-5-phosphatase, 72 kDa                                      |
| <i>INVS</i>    | ENST00000262457 | 9  | 102861538 | 103063282 | NM_014425    | inversin                                                                          |
| <i>IQCB1</i>   | ENST00000310864 | 3  | 121488610 | 121553926 | XM_005247913 | IQ motif containing B1                                                            |
| <i>ITM2B</i>   | ENST00000378565 | 13 | 48807294  | 48836460  | NM_021999    | integral membrane protein 2B                                                      |

|                 |                 |    |           |           |              |                                                                                  |
|-----------------|-----------------|----|-----------|-----------|--------------|----------------------------------------------------------------------------------|
| <i>KCNJ13</i>   | ENST00000233826 | 2  | 233631174 | 233641278 | NM_002242    | potassium inwardly-rectifying channel, subfamily J, member 13                    |
| <i>KCNV2</i>    | ENST00000382082 | 9  | 2717502   | 2730037   | NM_133497    | potassium channel, subfamily V, member 2                                         |
| <i>KIAA1549</i> | ENST00000422774 | 7  | 138522270 | 138666064 |              | KIAA1549                                                                         |
| <i>KIF7</i>     | ENST00000394412 | 15 | 90171208  | 90198682  | XM_005254904 | kinesin family member 7                                                          |
| <i>KIZ</i>      | ENST00000619189 | 20 | 21106695  | 21227260  | XM_011529298 | kizuna centrosomal protein                                                       |
| <i>KLHL7</i>    | ENST00000322275 | 7  | 23145404  | 23165664  | NM_001172428 | kelch-like family member 7                                                       |
|                 | ENST00000339077 | 7  | 23145403  | 23217533  | NM_001031710 | kelch-like family member 7                                                       |
| <i>LAMA1</i>    | ENST00000389658 | 18 | 6941743   | 7117813   | NM_005559    | laminin, alpha 1                                                                 |
| <i>LRAT</i>     | ENST00000336356 | 4  | 155665123 | 155674270 | NM_004744    | lecithin retinol acyltransferase (phosphatidylcholine-retinol O-acyltransferase) |
| <i>LRIT3</i>    | ENST00000594814 | 4  | 110769358 | 110793471 | NM_198506    | leucine-rich repeat, immunoglobulin-like and transmembrane domains 3             |
| <i>MAK</i>      | ENST00000474039 | 6  | 10762956  | 10838764  | XM_005249114 | male germ cell-associated kinase                                                 |
| <i>MERTK</i>    | ENST00000295408 | 2  | 112656056 | 112787138 | XM_005263568 | c-mer proto-oncogene tyrosine kinase                                             |
| <i>NEK2</i>     | ENST00000366998 | 1  | 211839772 | 211848899 | NM_001204183 | NIMA-related kinase 2                                                            |
|                 | ENST00000366999 | 1  | 211836114 | 211848960 | NM_002497    | NIMA-related kinase 2                                                            |
| <i>NEUROD1</i>  | ENST00000295108 | 2  | 182541194 | 182545603 | NM_002500    | neuronal differentiation 1                                                       |
| <i>NMNAT1</i>   | ENST00000377205 | 1  | 10003486  | 10045556  | NM_022787    | nicotinamide nucleotide adenyltransferase 1                                      |
|                 | ENST00000403197 | 1  | 10003486  | 10041824  | XM_005263489 | nicotinamide nucleotide adenyltransferase 1                                      |
| <i>NPHP1</i>    | ENST00000316534 | 2  | 110879888 | 110962619 |              | nephronophthisis 1 (juvenile)                                                    |
| <i>NPHP3</i>    | ENST00000337331 | 3  | 132400472 | 132441286 | NM_153240    | nephronophthisis 3 (adolescent)                                                  |
| <i>NPHP4</i>    | ENST00000378156 | 1  | 5922878   | 6052531   | XM_005263447 | nephronophthisis 4                                                               |
| <i>NR2E3</i>    | ENST00000621098 | 15 | 72102932  | 72107270  | NM_016346    | nuclear receptor subfamily 2 group E member 3                                    |
| <i>NRL</i>      | ENST00000397002 | 14 | 24549316  | 24553834  | XM_005267709 | neural retina leucine zipper                                                     |
| <i>NYX</i>      | ENST00000342595 | X  | 41306687  | 41334963  | NM_022567    | nyctalopin                                                                       |
| <i>OFD1</i>     | ENST00000340096 | X  | 13752864  | 13787472  | XM_005274601 | oral-facial-digital syndrome 1                                                   |
| <i>OPN1LW</i>   | ENST00000369951 | X  | 153409698 | 153424507 | NM_020061    | opsin 1 (cone pigments), long-wave-sensitive                                     |
| <i>OPN1MW</i>   | ENST00000369935 | X  | 153448107 | 153461633 | NM_000513    | opsin 1 (cone pigments), medium-wave-sensitive                                   |
| <i>OPN1SW</i>   | ENST00000249389 | 7  | 128412545 | 128415844 | NM_001708    | opsin 1 (cone pigments), short-wave-sensitive                                    |
| <i>OR2W3</i>    | ENST00000537741 | 1  | 248031277 | 248060449 |              | olfactory receptor, family 2, subfamily W, member 3                              |
| <i>OTX2</i>     | ENST00000339475 | 14 | 57267425  | 57277187  | NM_001270524 | orthodenticle homeobox 2                                                         |
| <i>PAX2</i>     | ENST00000428433 | 10 | 102505468 | 102589698 | XM_005269873 | paired box 2                                                                     |
|                 | ENST00000361791 | 10 | 102505468 | 102589074 | NM_003988    | paired box 2                                                                     |

|                |                 |    |           |           |              |                                                                   |
|----------------|-----------------|----|-----------|-----------|--------------|-------------------------------------------------------------------|
| <i>PCYT1A</i>  | ENST00000292823 | 3  | 195961239 | 196014584 | XM 005269343 | phosphate cytidyltransferase 1, choline, alpha                    |
| <i>PDE6A</i>   | ENST00000255266 | 5  | 149237519 | 149324356 | NM 000440    | phosphodiesterase 6A, cGMP-specific, rod, alpha                   |
| <i>PDE6B</i>   | ENST00000496514 | 4  | 619395    | 664542    |              | phosphodiesterase 6B, cGMP-specific, rod, beta                    |
| <i>PDE6C</i>   | ENST00000371447 | 10 | 95372345  | 95425767  | NM 006204    | phosphodiesterase 6C, cGMP-specific, cone, alpha prime            |
| <i>PDE6G</i>   | ENST00000331056 | 17 | 79617489  | 79623607  | NM 002602    | phosphodiesterase 6G, cGMP-specific, rod, gamma                   |
| <i>PDE6H</i>   | ENST00000266395 | 12 | 15125956  | 15134799  | NM 006205    | phosphodiesterase 6H, cGMP-specific, cone, gamma                  |
| <i>PITPNM3</i> | ENST00000262483 | 17 | 6354585   | 6459814   | NM 031220    | PITPNM family member 3                                            |
| <i>POC1B</i>   | ENST00000313546 | 12 | 89813495  | 89919801  | NM 172240    | POC1 centriolar protein B                                         |
| <i>PPT1</i>    | ENST00000433473 | 1  | 40538379  | 40563375  | NM 000310    | palmitoyl-protein thioesterase 1                                  |
| <i>PRCD</i>    | ENST00000586148 | 17 | 74536172  | 74539469  |              | progressive rod-cone degeneration                                 |
| <i>PROM1</i>   | ENST00000447510 | 4  | 15969849  | 16077741  | NM 006017    | prominin 1                                                        |
| <i>PRPF3</i>   | ENST00000324862 | 1  | 150293925 | 150325671 | NM 004698    | pre-mRNA processing factor 3                                      |
| <i>PRPF31</i>  | ENST00000321030 | 19 | 54618837  | 54635140  | NM 015629    | pre-mRNA processing factor 31                                     |
| <i>PRPF4</i>   | ENST00000374198 | 9  | 116037922 | 116055056 | NM 001244926 | pre-mRNA processing factor 4                                      |
| <i>PRPF6</i>   | ENST00000266079 | 20 | 62612488  | 62664453  | NM 012469    | pre-mRNA processing factor 6                                      |
| <i>PRPF8</i>   | ENST00000304992 | 17 | 1553923   | 1588176   | NM 006445    | pre-mRNA processing factor 8                                      |
| <i>PRPH2</i>   | ENST00000230381 | 6  | 42664340  | 42690312  | NM 000322    | peripherin 2 (retinal degeneration, slow)                         |
| <i>RAB28</i>   | ENST00000330852 | 4  | 13369348  | 13485989  | NM 001017979 | RAB28, member RAS oncogene family                                 |
|                | ENST00000288723 | 4  | 13369348  | 13485989  | NM 004249    | RAB28, member RAS oncogene family                                 |
|                | ENST00000338176 | 4  | 13369349  | 13485989  | XM 005248217 | RAB28, member RAS oncogene family                                 |
| <i>RASSF8</i>  | ENST00000381352 | 12 | 26111962  | 26232825  | XM 005253295 | Ras association (RalGDS/AF-6) domain family (N-terminal) member 8 |
|                | ENST00000542865 | 12 | 26126688  | 26222418  | NM 001164747 | Ras association (RalGDS/AF-6) domain family (N-terminal) member 8 |
| <i>RAX2</i>    | ENST00000555978 | 19 | 3769087   | 3772209   | NM 032753    | retina and anterior neural fold homeobox 2                        |
| <i>RBP3</i>    | ENST00000224600 | 10 | 48381487  | 48390991  | NM 002900    | retinol binding protein 3, interstitial                           |
| <i>RBP4</i>    | ENST00000371464 | 10 | 95351444  | 95360983  | NM 006744    | retinol binding protein 4, plasma                                 |
| <i>RD3</i>     | ENST00000367002 | 1  | 211649864 | 211666259 | NM 001164688 | retinal degeneration 3                                            |
| <i>RDH11</i>   | ENST00000381346 | 14 | 68143518  | 68162531  | XM 005267732 | retinol dehydrogenase 11 (all-trans/9-cis/11-cis)                 |
| <i>RDH12</i>   | ENST00000551171 | 14 | 68168603  | 68201169  | NM 152443    | retinol dehydrogenase 12 (all-trans/9-cis/11-cis)                 |
| <i>RDH5</i>    | ENST00000257895 | 12 | 56114182  | 56118489  | NM 001199771 | retinol dehydrogenase 5 (11-cis/9-cis)                            |
| <i>RGR</i>     | ENST00000359452 | 10 | 86004809  | 86019716  | NM 002921    | retinal G protein coupled receptor                                |
| <i>RHO</i>     | ENST00000296271 | 3  | 129247483 | 129254012 | NM 000539    | rhodopsin                                                         |
| <i>RIMS1</i>   | ENST00000521978 | 6  | 72596727  | 73110416  | NM 014989    | regulating synaptic membrane exocytosis 1                         |



|                 |                 |    |           |           |              |                                                                            |
|-----------------|-----------------|----|-----------|-----------|--------------|----------------------------------------------------------------------------|
|                 | ENST00000517827 | 6  | 72926463  | 73110571  | NM_001168410 | regulating synaptic membrane exocytosis 1                                  |
|                 | ENST00000401910 | 6  | 72922514  | 73110607  | NM_001168407 | regulating synaptic membrane exocytosis 1                                  |
| <i>RLBP1</i>    | ENST00000268125 | 15 | 89753100  | 89764982  | NM_000326    | retinaldehyde binding protein 1                                            |
| <i>ROM1</i>     | ENST00000278833 | 11 | 62380213  | 62382592  | NM_000327    | retinal outer segment membrane protein 1                                   |
| <i>RPI</i>      | ENST00000220676 | 8  | 55528627  | 55543394  | NM_006269    | retinitis pigmentosa 1 (autosomal dominant)                                |
| <i>RP2</i>      | ENST00000218340 | X  | 46696375  | 46741793  | NM_006915    | retinitis pigmentosa 2 (X-linked recessive)                                |
| <i>RP9</i>      | ENST00000297157 | 7  | 33134409  | 33149002  | NM_203288    | retinitis pigmentosa 9 (autosomal dominant)                                |
| <i>RPE65</i>    | ENST00000262340 | 1  | 68894505  | 68915642  | NM_000329    | retinal pigment epithelium-specific protein 65kDa                          |
| <i>RPGR</i>     | ENST00000378505 | X  | 38143662  | 38186797  | NM_001034853 | retinitis pigmentosa GTPase regulator                                      |
|                 | ENST00000318842 | X  | 38128416  | 38186817  | NM_000328    | retinitis pigmentosa GTPase regulator                                      |
| <i>RPGRIP1</i>  | ENST00000400017 | 14 | 21756136  | 21819454  | XM_005267881 | retinitis pigmentosa GTPase regulator interacting protein 1                |
| <i>RPGRIP1L</i> | ENST00000379925 | 16 | 53634690  | 53737758  | NM_015272    | RPGRIP1-like                                                               |
| <i>SAG</i>      | ENST00000409110 | 2  | 234216467 | 234255701 | XM_005246099 | S-antigen; retina and pineal gland (arrestin)                              |
| <i>SDCCAG8</i>  | ENST00000366541 | 1  | 243419358 | 243663394 | XM_005273016 | serologically defined colon cancer antigen 8                               |
| <i>SEMA4A</i>   | ENST00000368285 | 1  | 156123318 | 156147535 | XM_005245441 | semaphorin 4A                                                              |
| <i>SLC24A1</i>  | ENST00000537259 | 15 | 65903743  | 65953333  |              | solute carrier family 24 (sodium/potassium/calcium exchanger), member 1    |
|                 | ENST00000261892 | 15 | 65914270  | 65948598  | XM_005254778 | solute carrier family 24 (sodium/potassium/calcium exchanger), member 1    |
| <i>SLC7A14</i>  | ENST00000231706 | 3  | 170177372 | 170303863 | NM_020949    | solute carrier family 7, member 14                                         |
| <i>SNRNP200</i> | ENST00000323853 | 2  | 96940074  | 96971253  | NM_014014    | small nuclear ribonucleoprotein 200kDa (U5)                                |
| <i>SPATA7</i>   | ENST00000393545 | 14 | 88851874  | 88904800  | XM_005267857 | spermatogenesis associated 7                                               |
| <i>TIMP3</i>    | ENST00000266085 | 22 | 33197687  | 33259030  | NM_000362    | TIMP metalloproteinase inhibitor 3                                         |
| <i>TMEM138</i>  | ENST00000278826 | 11 | 61129473  | 61136981  | NM_016464    | transmembrane protein 138                                                  |
| <i>TMEM216</i>  | ENST00000334888 | 11 | 61159832  | 61166335  | XM_005274039 | transmembrane protein 216                                                  |
| <i>TMEM237</i>  | ENST00000409883 | 2  | 202484907 | 202508240 | XM_005246785 | transmembrane protein 237                                                  |
|                 | ENST00000409444 | 2  | 202484907 | 202507667 | NM_152388    | transmembrane protein 237                                                  |
| <i>TOPORS</i>   | ENST00000360538 | 9  | 32540542  | 32552551  | NM_005802    | topoisomerase I binding, arginine/serine-rich, E3 ubiquitin protein ligase |
| <i>TPPI</i>     | ENST00000299427 | 11 | 6634000   | 6640692   | NM_000391    | tripeptidyl peptidase I                                                    |
| <i>TRPM1</i>    | ENST00000559179 | 15 | 31361579  | 31393930  | NM_001252030 | transient receptor potential cation channel, subfamily M, member 1         |
|                 | ENST00000256552 | 15 | 31293537  | 31393924  | NM_001252024 | transient receptor potential cation channel, subfamily M, member 1         |

|               |                    |    |           |           |              |                                                                    |
|---------------|--------------------|----|-----------|-----------|--------------|--------------------------------------------------------------------|
|               | ENST00000542188 15 | 15 | 31293553  | 31453476  | NM_001252020 | transient receptor potential cation channel, subfamily M, member 1 |
| <i>TTC8</i>   | ENST00000380656 14 | 14 | 89291006  | 89344331  | NM_144596    | tetratricopeptide repeat domain 8                                  |
|               | ENST00000338104 14 | 14 | 89291000  | 89344332  | XM_005267337 | tetratricopeptide repeat domain 8                                  |
| <i>TLL5</i>   | ENST00000298832 14 | 14 | 76127621  | 76421421  | XM_005267450 | tubulin tyrosine ligase-like family, member 5                      |
| <i>TTPA</i>   | ENST00000260116 8  | 8  | 63972342  | 63998612  | NM_000370    | tocopherol (alpha) transfer protein                                |
| <i>TUB</i>    | ENST00000299506 11 | 11 | 8102909   | 8123515   | NM_177972    | tubby bipartite transcription factor                               |
| <i>TUB</i>    | ENST00000305253 11 | 11 | 8060180   | 8127659   | XM_005253109 | tubby bipartite transcription factor                               |
| <i>TULP1</i>  | ENST00000229771 6  | 6  | 35465651  | 35480715  | NM_003322    | tubby like protein 1                                               |
| <i>UNC119</i> | ENST00000301032 17 | 17 | 26873726  | 26879649  | NM_054035    | unc-119 homolog (C. elegans)                                       |
|               | ENST00000335765 17 | 17 | 26873725  | 26879686  | XM_005258066 | unc-119 homolog (C. elegans)                                       |
| <i>USH2A</i>  | ENST00000366942 1  | 1  | 216347288 | 216596738 | NM_007123    | Usher syndrome 2A (autosomal recessive, mild)                      |
|               | ENST00000307340 1  | 1  | 215796236 | 216596738 | NM_206933    | Usher syndrome 2A (autosomal recessive, mild)                      |
| <i>VPS13B</i> | ENST00000355155 8  | 8  | 100025494 | 100222015 | NM_015243    | vacuolar protein sorting 13 homolog B (yeast)                      |
|               | ENST00000358544 8  | 8  | 100025494 | 100889808 | XM_005250803 | vacuolar protein sorting 13 homolog B (yeast)                      |
| <i>WDR19</i>  | ENST00000399820 4  | 4  | 39184024  | 39287430  | XM_005262658 | WD repeat domain 19                                                |
| <i>ZNF408</i> | ENST00000311764 11 | 11 | 46722368  | 46727462  | NM_024741    | zinc finger protein 408                                            |
| <i>ZNF423</i> | ENST00000561648 16 | 16 | 49521435  | 49856650  | XM_005255857 | zinc finger protein 423                                            |
| <i>ZNF513</i> | ENST00000323703 2  | 2  | 27600098  | 27603592  | XM_005264143 | zinc finger protein 513                                            |

*eTable 2. Homozygous variants found in ES for autosomal recessive model (MAF<0.05).*

| <b>Gene</b>   | <b>gDNA change (hg19)</b> | <b>cDNA change (Transcript Number)</b> | <b>amino acid change</b> |
|---------------|---------------------------|----------------------------------------|--------------------------|
| <i>ITIH2</i>  | Chr10: 7769692            | c.1180C>T (NM_002216.2)                | p.(Arg394Trp)            |
| <i>PRDM10</i> | Chr11: 129800931          | c.1510C>T (NM_020228.2)                | p.(Arg504Cys)            |
| <i>VSX2</i>   | Chr14: 74726320           | c.595C>T (NM_182894.2)                 | p.(Arg199Cys)            |
| <i>BCR</i>    | Chr22: 23656782           | c.3607C>G (NM_004327.3)                | p.(Leu1203Val)           |

### **eAppendix. Discussion of *VSX2* variants identified herein in respect to the literature**

Iseri et al. reported a consanguineous Iranian pedigree of two siblings with microphthalmia and coloboma homozygous for the c.249delG p.(Leu84Serfs\*57) pathogenic variant in *VSX2*<sup>1</sup>. The siblings were blind with undetectable ffERG responses. Their heterozygous parents presented a significant reduction of ffERG a- and b-waves under both dark- and light-adapted conditions with an additional reduction in the b/a amplitude ratio to a bright flash under dark-adapted conditions. Authors hypothesized that this *VSX2* gene defects might act as semi-dominant and produce a generalized retinal dysfunction affecting rod and cone systems with an additional post-phototransduction dysfunction while in heterozygous state. Khan et al. reported a female patient homozygous for the c.773delA p.(Lys258Serfs\*44) variant in *VSX2* and a clinical phenotype close to Knobloch syndrome: infantile upbeat nystagmus, high myopia, low BCVA, atrophic chorio-retinal changes and lens luxation<sup>2</sup>. ffERG found delayed and decreased scotopic and photopic responses, with photopic responses being more severely altered. However, there was no indication of an electronegative ERG response. Nevertheless, the clinical picture of the latter subject resembles best the phenotype of the subjects presented herein.

Moreover, the clinical phenotype of our patients was more complex than known CSNB phenotypes. It included developmental abnormalities as anterior segment abnormalities (lens subluxation and cataracts in patients 1 and 3), ciliary body hypoplasia in patient 3, atrophic peripheral retinal changes (patients 1 and 2) and wedge-shaped inferior chorio-retinal atrophy reminiscent of chorio-retinal coloboma and foveal hypoplasia in patient 3. Noteworthy, the

latter patient was myopic in spite of the short axial length (Table 1 in the main article) that is suggestive of index myopia most probably due to anterior segment abnormalities. The ocular disease thus could be more properly characterized as ocular developmental abnormality and retinopathy with a bipolar-specific phenotype. Nevertheless, the initial presentation in the youngest patient was very close to CSNB, anterior segment abnormalities appearing probably later in life. In addition, we need to wait for a longer follow-up to assess the non-progressive character of retinal involvement of patient 3.

### **eReferences**

1. Iseri SU, Wyatt AW, Nürnberg G, et al. Use of genome-wide SNP homozygosity mapping in small pedigrees to identify new mutations in *VSX2* causing recessive microphthalmia and a semidominant inner retinal dystrophy. *Hum Genet.* 2010;128(1):51-60. doi:10.1007/s00439-010-0823-6
2. Khan AO, Aldahmesh MA, Noor J, Salem A, Alkuraya FS. Lens Subluxation and Retinal Dysfunction in a Girl with Homozygous *VSX2* Mutation. *Ophthalmic Genetics.* 2015;36(1):8-13. doi:10.3109/13816810.2013.827217
